# Supplementary material for: Equine Gram-Negative Oral Microbiota: An Antimicrobial Resistances Watcher?
Source: MDPI journal article supplement (doi:10.3390/antibiotics12040792), 2023-04-21
Supplement: s1 [file s1]

**Table S1:** Zone diameter breakpoints for the antimicrobials used.

| Antimicrobial agent | Zone Diameter Breakpoints (mm) |              |           |
|---------------------|--------------------------------|--------------|-----------|
|                     | Susceptible                    | Intermediate | Resistant |
| AML                 | ≥17                            | 14-16        | ≤13       |
| AMC                 | ≥18                            | 14-17        | ≤13       |
| TIC                 | ≥20                            | 15-19        | ≤14       |
| TIM                 | ≥20                            | 15-19        | ≤14       |
| PRL                 | ≥21                            | 18-20        | ≤16       |
| TZP                 | ≥21                            | 18-20        | ≤17       |
| KF                  | ≥18                            | 14-17        | ≤13       |
| FOX                 | ≥18                            | 15-17        | ≤14       |
| CAZ                 | ≥21                            | 18-20        | ≤17       |
| CTX                 | ≥26                            | 23-25        | ≤22       |
| CRO                 | ≥23                            | 20-22        | ≤19       |
| CFP                 | ≥21                            | 16-20        | ≤15       |
| ATM                 | ≥21                            | 18-20        | ≤17       |
| IPM                 | ≥23                            | 20-22        | ≤19       |
| MEM                 | ≥23                            | 20-22        | ≤19       |
| ETP                 | ≥22                            | 19-21        | ≤18       |
| NA                  | ≥19                            | 14-18        | ≤13       |
| CIP                 | ≥26                            | 22-25        | ≤21       |
| K                   | ≥18                            | 14-17        | ≤13       |
| TOB                 | ≥15                            | 13-14        | ≤12       |
| CN                  | ≥15                            | 13-14        | ≤12       |
| AK                  | ≥17                            | 15-16        | ≤14       |
| E                   | ≥23                            | 14-22        | ≤13       |
| SXT                 | ≥16                            | 11-15        | ≤10       |
| TE                  | ≥15                            | 12-14        | ≤11       |
| C                   | ≥18                            | 13-17        | ≤12       |
| FOS                 | ≥16                            | 13-15        | ≤12       |
